# Supplementary material for: Anti-Cancer and Anti-Inflammatory Activities of Three New Chromone Derivatives from the Marine-Derived Penicillium citrinum
Source: MDPI journal article supplement (doi:10.3390/md19080408), 2021-07-23
Supplement: s1 [file s1]

## Supplementary Materials

# Anti-Cancer and Anti-Inflammatory Activities of Three New Chromone Derivatives from the Marine-Derived *Penicillium citrinum*

Yi-Cheng Chu <sup>1</sup>, Chun-Hao Chang <sup>2</sup>, Hsiang-Ruei Liao <sup>3</sup>, Shu-Ling Fu <sup>1</sup> and Jih-Jung Chen <sup>4,5,\*</sup>

<sup>1</sup> Institute of Traditional Medicine, School of Medicine, National Yang Ming Chiao Tung University, Taipei 112, Taiwan; chuyc.md07@nycu.edu.tw (Y.-C.C.); slfu@nycu.edu.tw (S.-L.F.)

<sup>2</sup> Institute of Biopharmaceutical Sciences, Pharmaceutical Sciences, National Yang Ming Chiao Tung University, Taipei 112, Taiwan; changch.ps08@nycu.edu.tw

<sup>3</sup> Graduate Institute of Natural Products, College of Medicine, Chang Gung University, Taoyuan 333, Taiwan; liaoch@mail.cgu.edu.tw

<sup>4</sup> Department of Pharmacy, School of Pharmaceutical Sciences, National Yang Ming Chiao Tung University, Taipei 112, Taiwan

<sup>5</sup> Department of Medical Research, China Medical University Hospital, China Medical University, Taichung 404, Taiwan

\* Correspondence: jjungchen@nycu.edu.tw; Tel.: +886-2-2826-7195; Fax: +886-2-2823-2940

## Contents

|                                                                                                |     |
|------------------------------------------------------------------------------------------------|-----|
| <b>Figure S1.</b> CD and ECD spectra of epiremisporeine B.....                                 | S3  |
| <b>Figure S2.</b> HRESIMS spectrum of <b>1</b> .....                                           | S3  |
| <b>Figure S3.</b> $^1\text{H}$ NMR spectrum ( $\text{CDCl}_3$ , 500 MHz) of <b>1</b> .....     | S4  |
| <b>Figure S4.</b> $^{13}\text{C}$ NMR spectrum ( $\text{CDCl}_3$ , 125 MHz) of <b>1</b> .....  | S4  |
| <b>Figure S5.</b> $^1\text{H}$ - $^1\text{H}$ COSY spectrum of <b>1</b> .....                  | S5  |
| <b>Figure S6.</b> ROESY spectrum of <b>1</b> .....                                             | S5  |
| <b>Figure S7.</b> HMBC spectrum of <b>1</b> .....                                              | S6  |
| <b>Figure S8.</b> HSQC spectrum of <b>1</b> .....                                              | S6  |
| <b>Figure S9.</b> CD spectrum of <b>1</b> .....                                                | S7  |
| <b>Figure S10.</b> HRESIMS spectrum of <b>2</b> .....                                          | S7  |
| <b>Figure S11.</b> $^1\text{H}$ NMR spectrum ( $\text{CDCl}_3$ , 500 MHz) of <b>2</b> .....    | S8  |
| <b>Figure S12.</b> $^{13}\text{C}$ NMR spectrum ( $\text{CDCl}_3$ , 125 MHz) of <b>2</b> ..... | S8  |
| <b>Figure S13.</b> $^1\text{H}$ - $^1\text{H}$ COSY spectrum of <b>2</b> .....                 | S9  |
| <b>Figure S14.</b> ROESY spectrum of <b>2</b> .....                                            | S9  |
| <b>Figure S15.</b> Expanded ROESY spectrum of <b>2</b> .....                                   | S10 |
| <b>Figure S16.</b> HMBC spectrum of <b>2</b> .....                                             | S10 |
| <b>Figure S17.</b> HSQC spectrum of <b>2</b> .....                                             | S11 |
| <b>Figure S18.</b> CD spectrum of <b>2</b> .....                                               | S11 |
| <b>Figure S19.</b> HRESIMS spectrum of <b>3</b> .....                                          | S12 |
| <b>Figure S20.</b> $^1\text{H}$ NMR spectrum ( $\text{CDCl}_3$ , 500 MHz) of <b>3</b> .....    | S12 |
| <b>Figure S21.</b> $^{13}\text{C}$ NMR spectrum ( $\text{CDCl}_3$ , 125 MHz) of <b>3</b> ..... | S13 |
| <b>Figure S22.</b> $^1\text{H}$ - $^1\text{H}$ COSY spectrum of <b>3</b> .....                 | S13 |
| <b>Figure S23.</b> ROESY spectrum of <b>3</b> .....                                            | S14 |
| <b>Figure S24.</b> HMBC spectrum of <b>3</b> .....                                             | S14 |
| <b>Figure S25.</b> HSQC spectrum of <b>3</b> .....                                             | S15 |
| <b>Figure S26.</b> CD spectrum of <b>3</b> .....                                               | S15 |
| <b>Table S1.</b> The cytotoxicity data of compounds <b>1–3</b> against HT-29 cell.....         | S16 |
| <b>Table S2.</b> The cytotoxicity data of compounds <b>1–3</b> against A549 cell.....          | S16 |

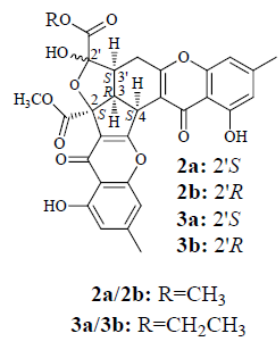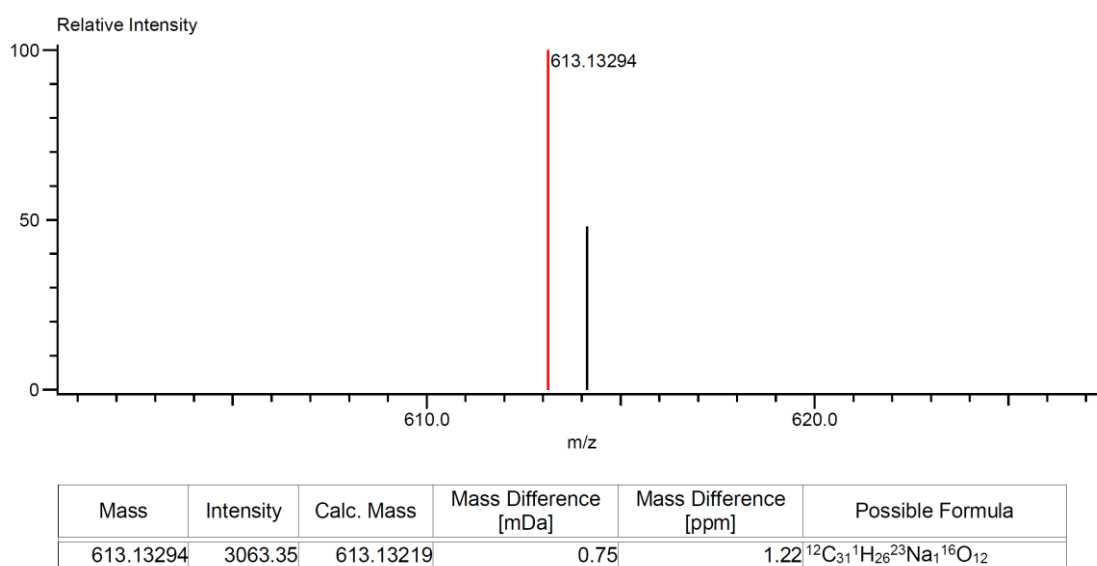

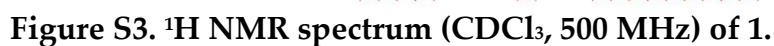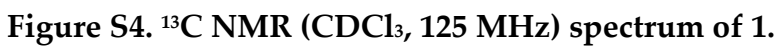

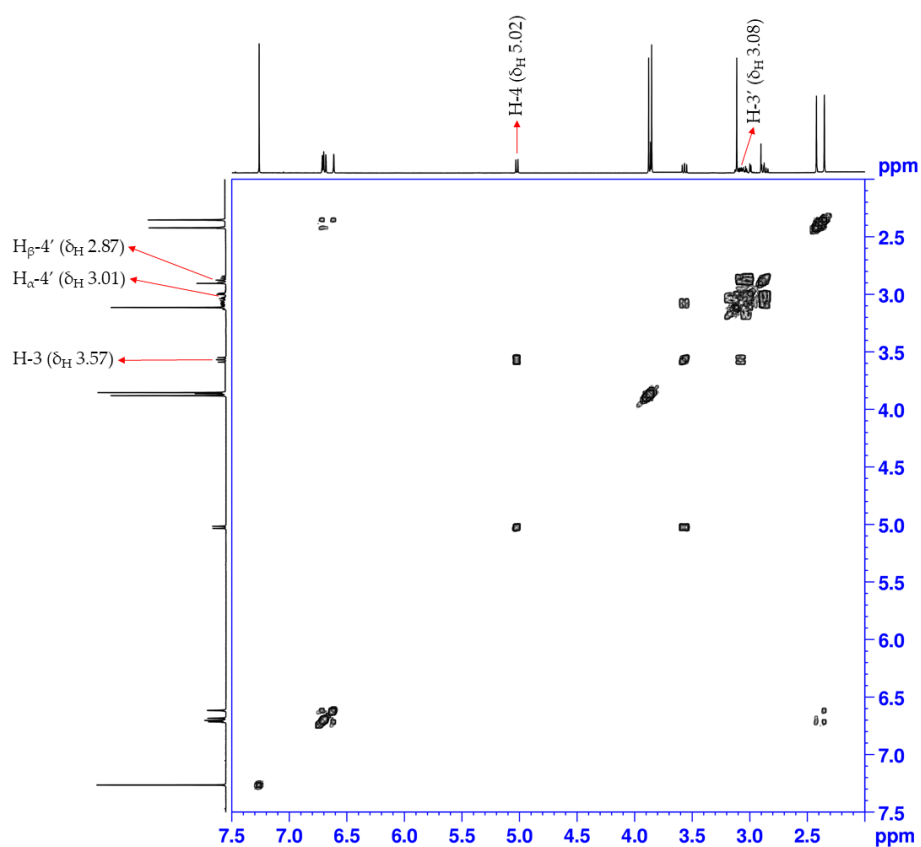

Figure S5.  $^1\text{H}$ - $^1\text{H}$  COSY spectrum of 1.

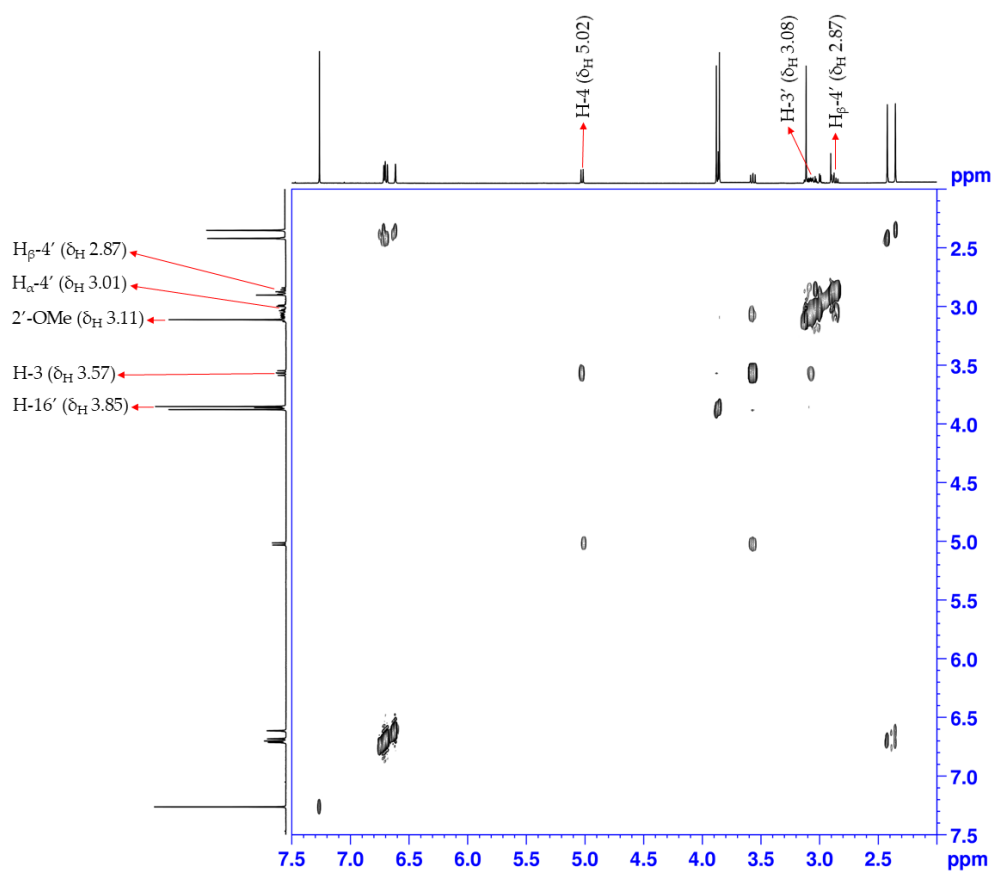

Figure S6. ROESY spectrum of 1.

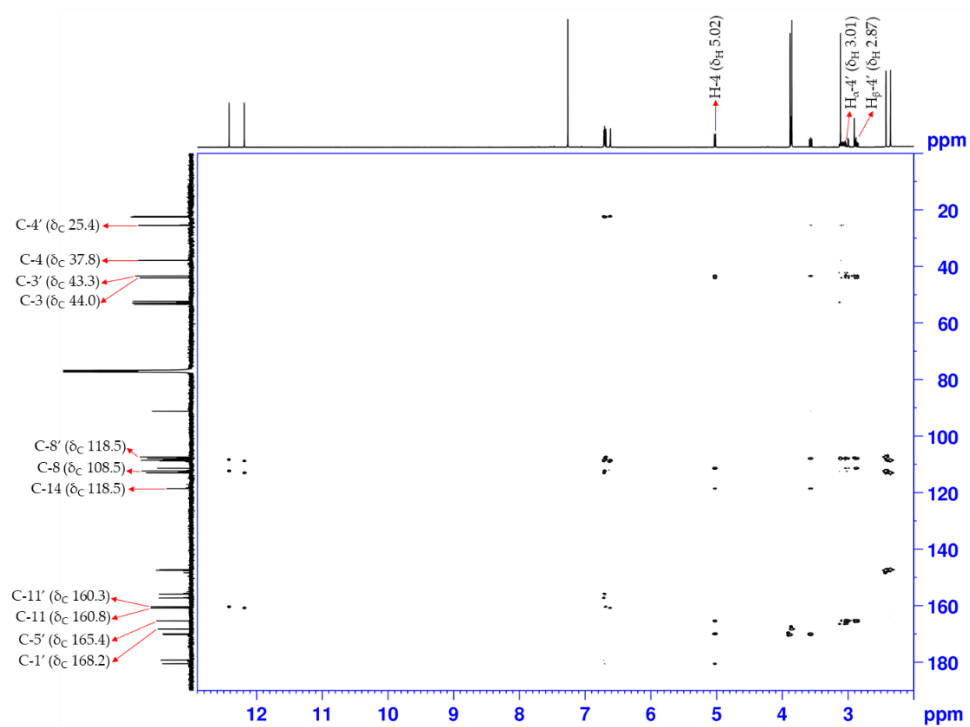

Figure S7. HMBC spectrum of 1.

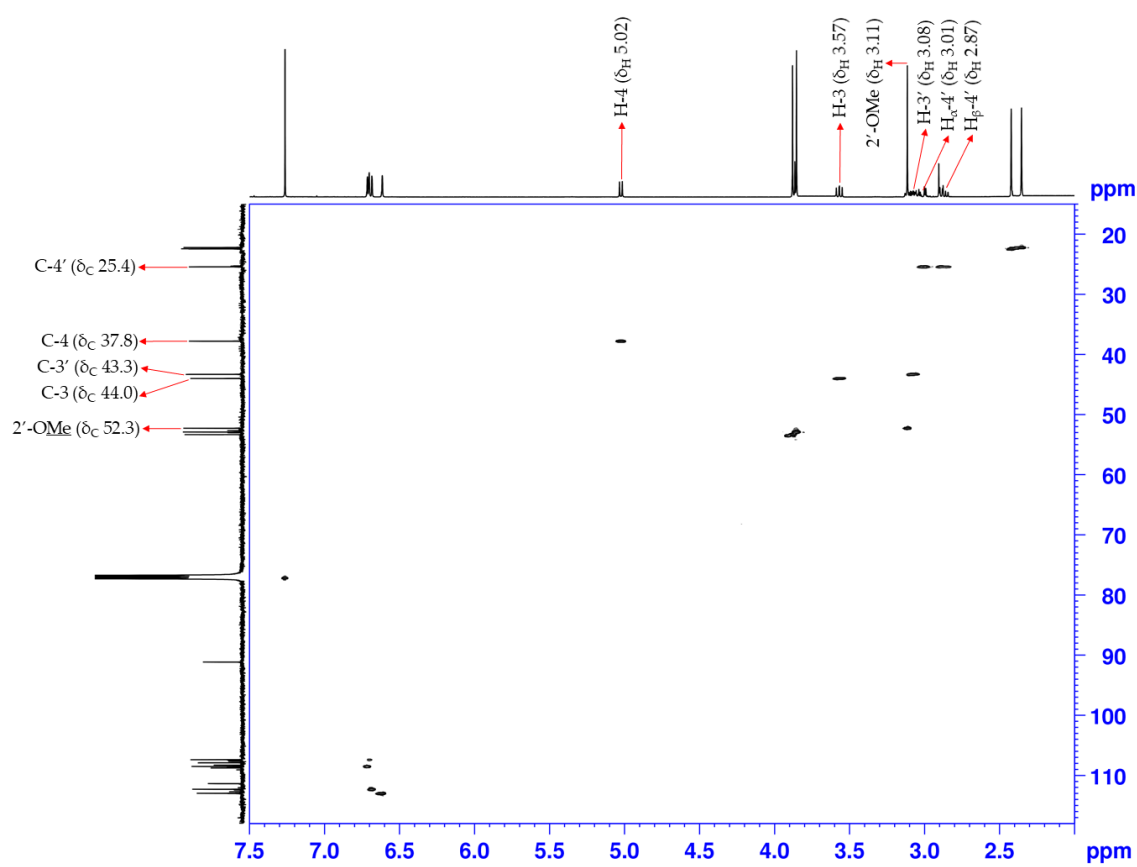

Figure S8. HSQC spectrum of 1.

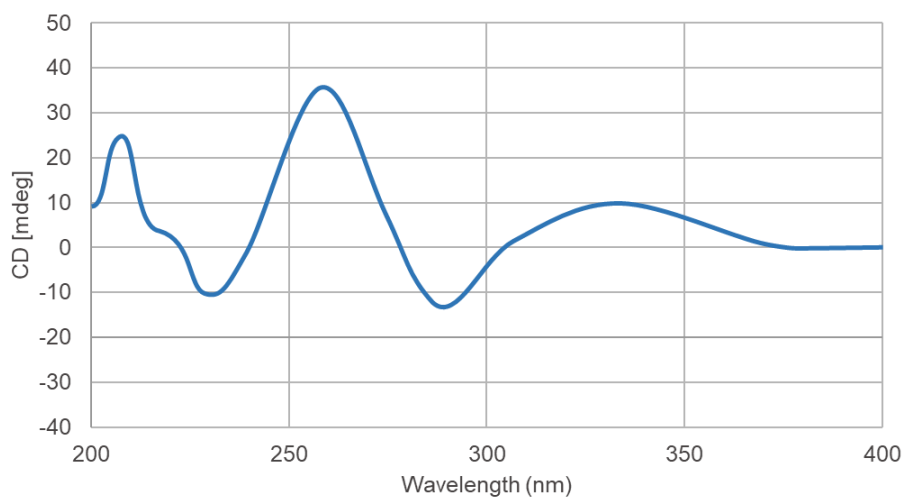

**Figure S9. CD spectrum of 1.**

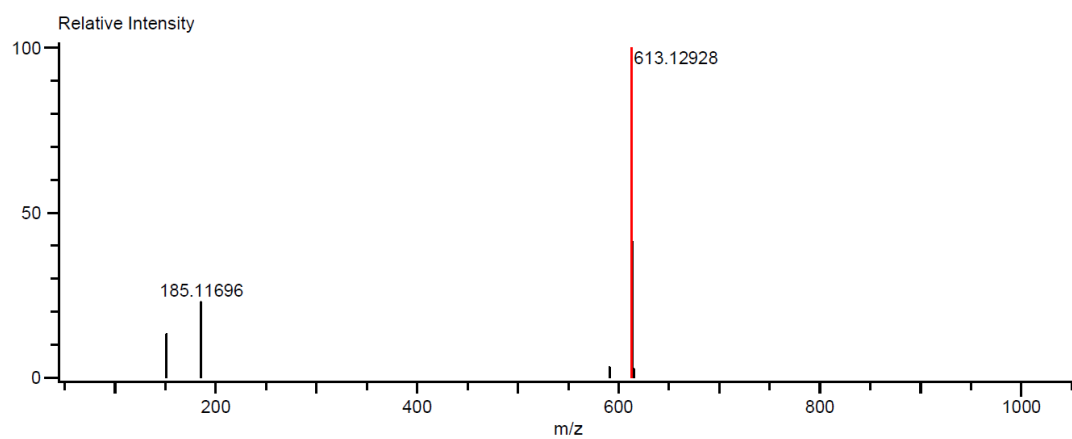

| Mass      | Intensity | Calc. Mass | Mass Difference [mDa] | Mass Difference [ppm] | Possible Formula                                                    |
|-----------|-----------|------------|-----------------------|-----------------------|---------------------------------------------------------------------|
| 613.12928 | 5571.97   | 613.13219  | -2.91                 | -4.75                 | $^{12}\text{C}_{31}\text{H}_{26}^{23}\text{Na}_1^{16}\text{O}_{12}$ |
|           |           | 613.03829  | 90.99                 | 148.42                | $^{12}\text{C}_{32}\text{H}_{14}^{23}\text{Na}_1^{16}\text{O}_{12}$ |

**Figure S10. HRESIMS spectrum of 2.**

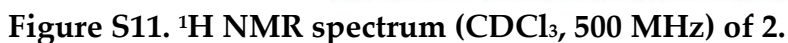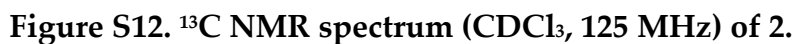



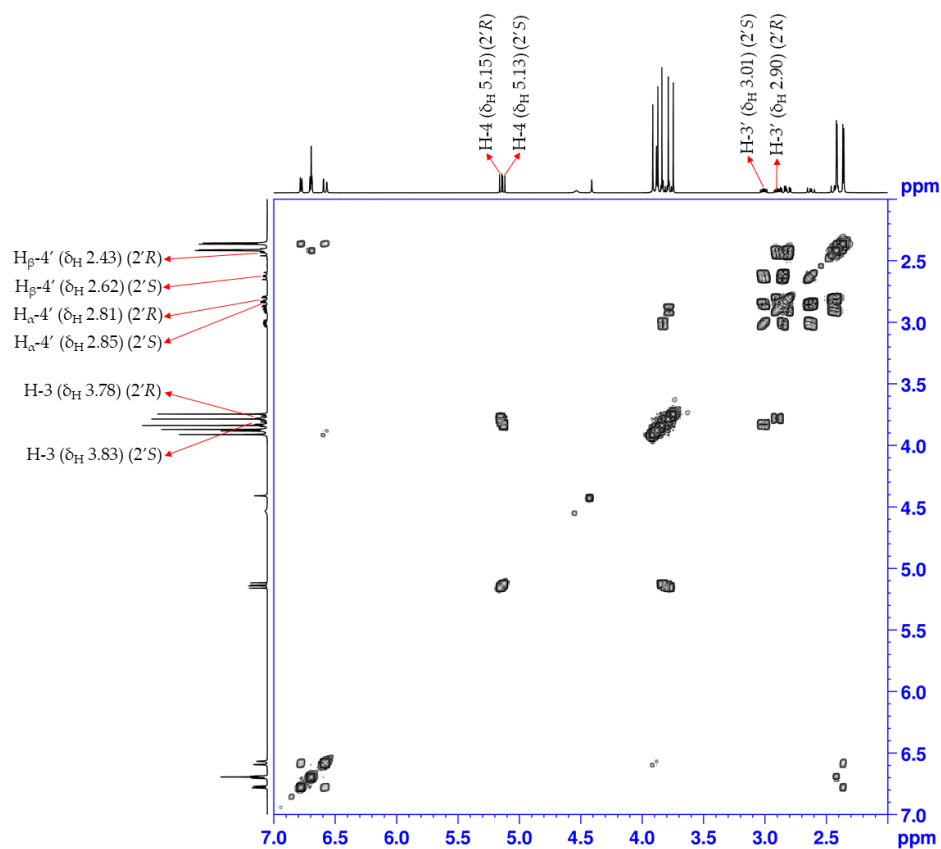

Figure S13.  $^1\text{H}$ - $^1\text{H}$  COSY spectrum of **2**.

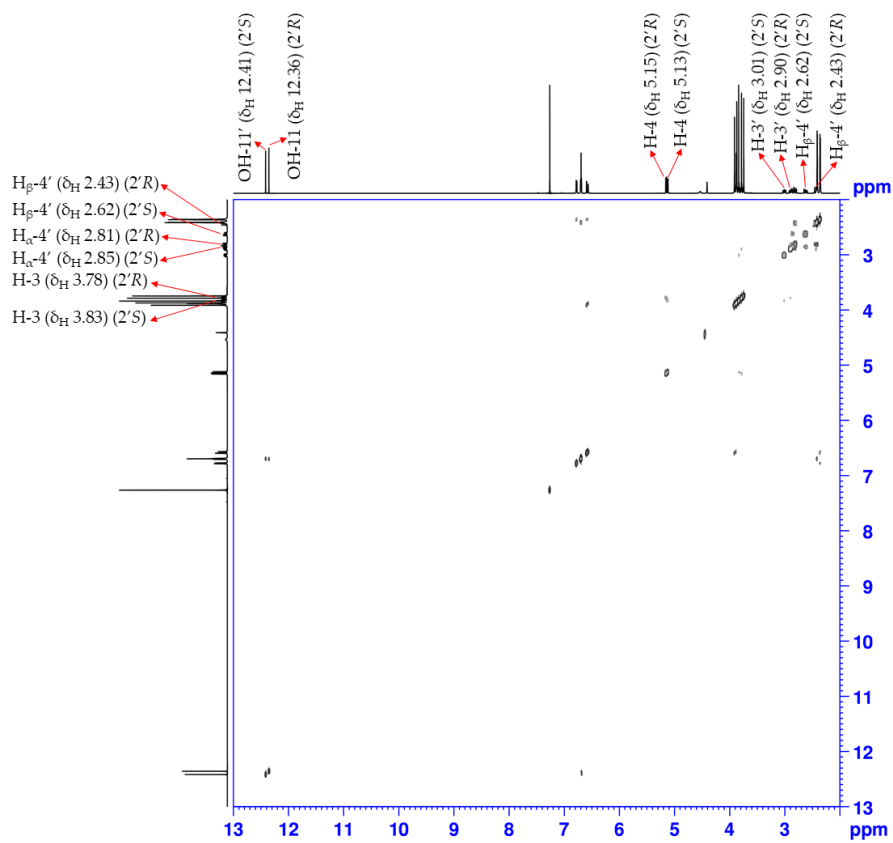

Figure S14. ROESY spectrum of **2**.

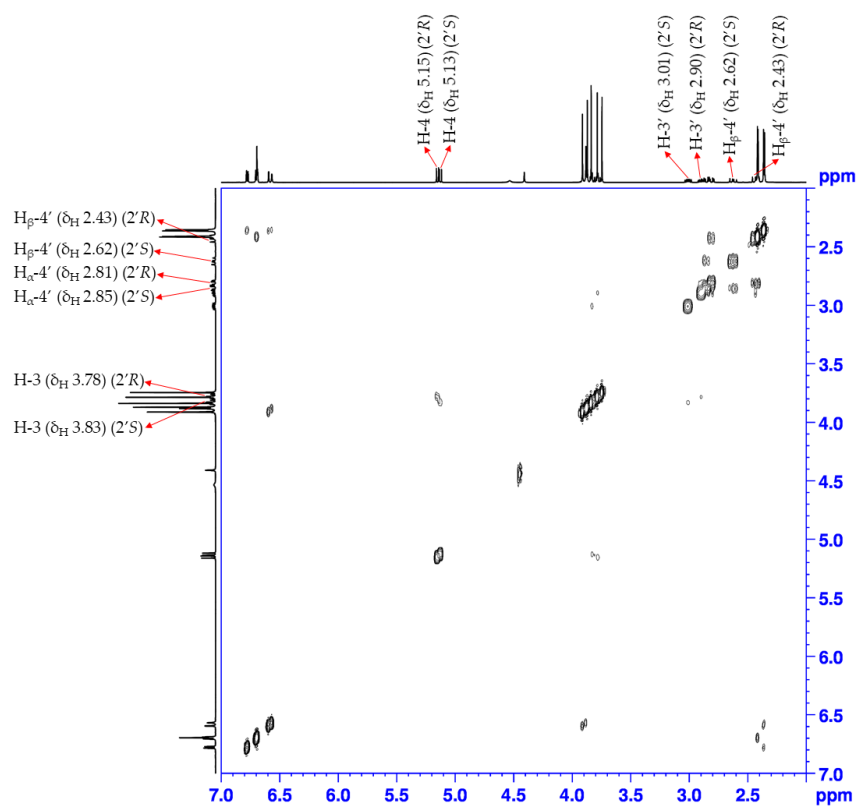

Figure S15. Expanded ROESY spectrum of 2.

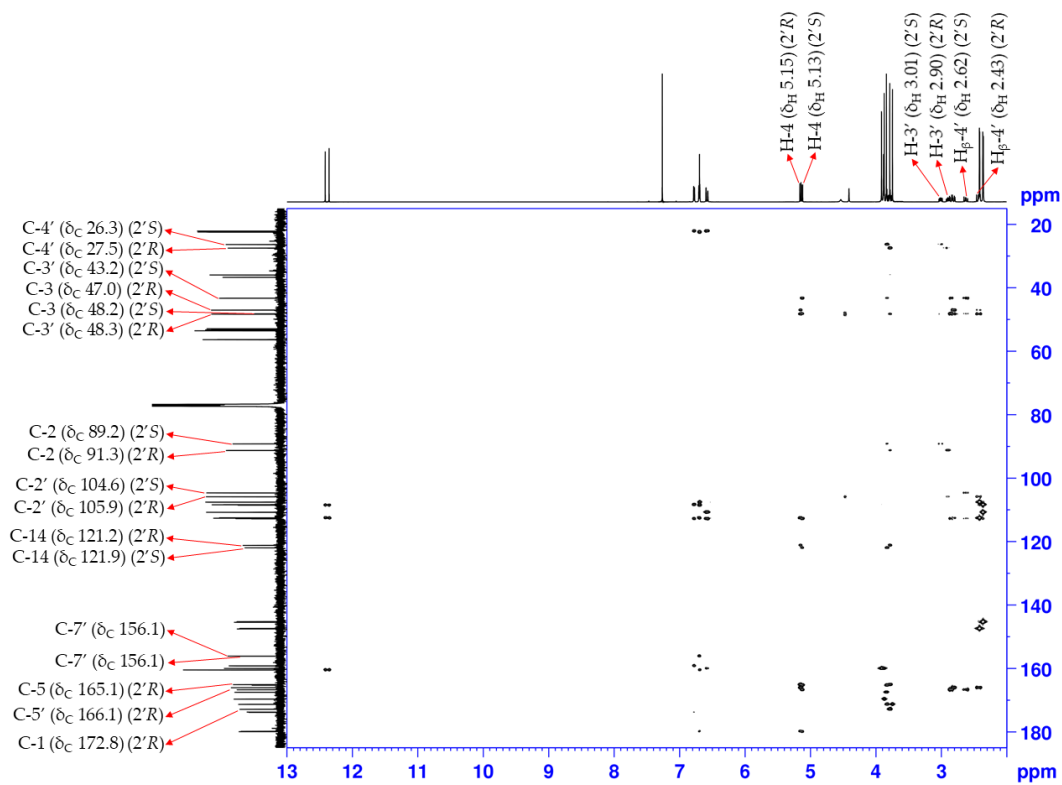

Figure S16. HMBC spectrum of 2.

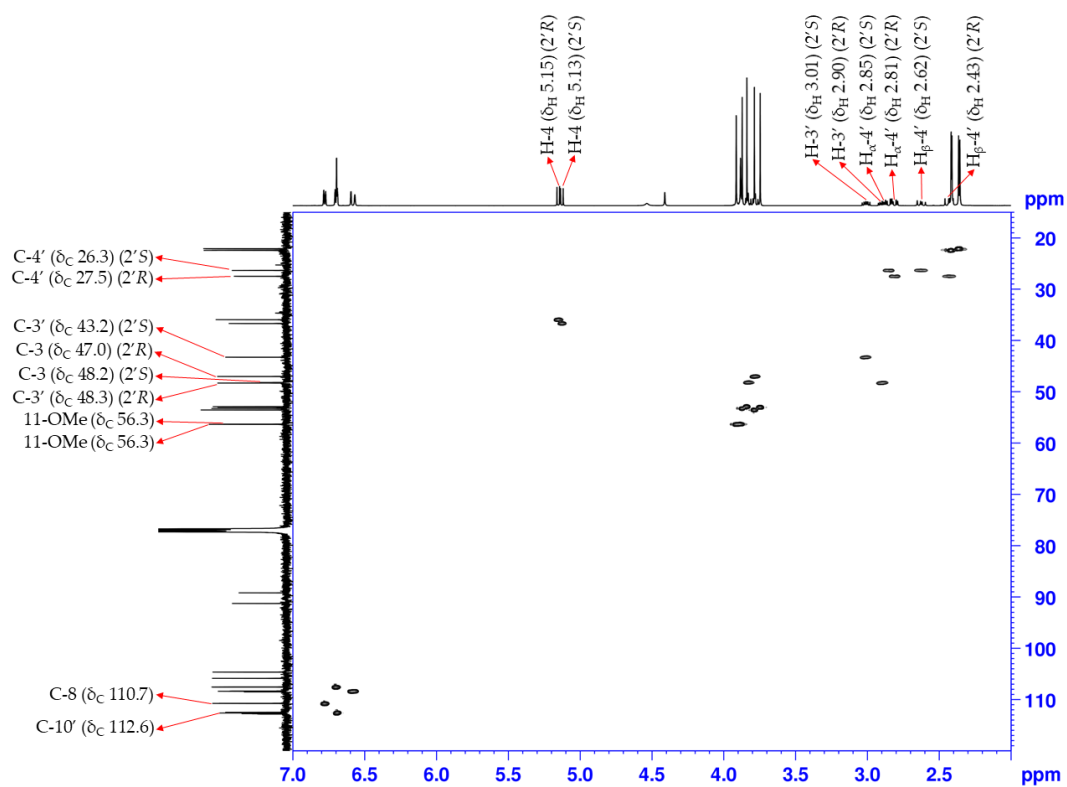

Figure S17. HSQC spectrum of 2.

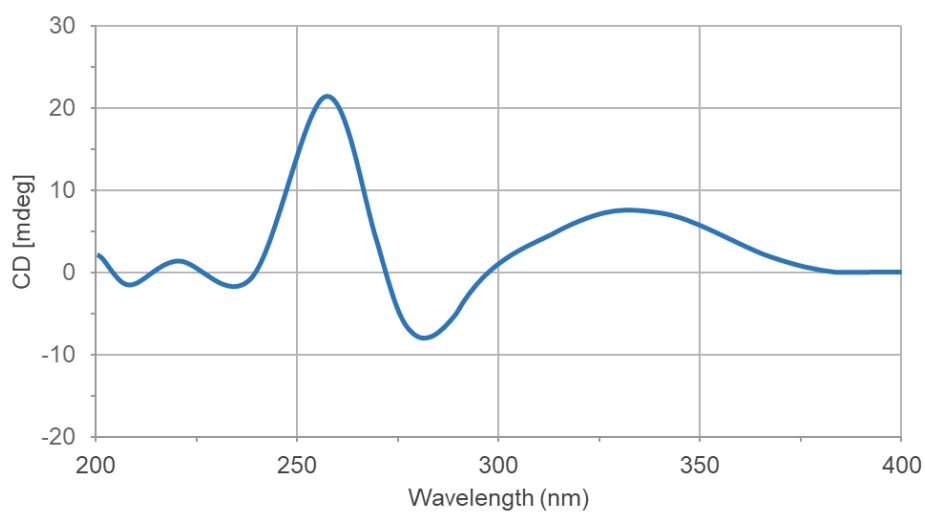

Figure S18. CD spectrum of 2.

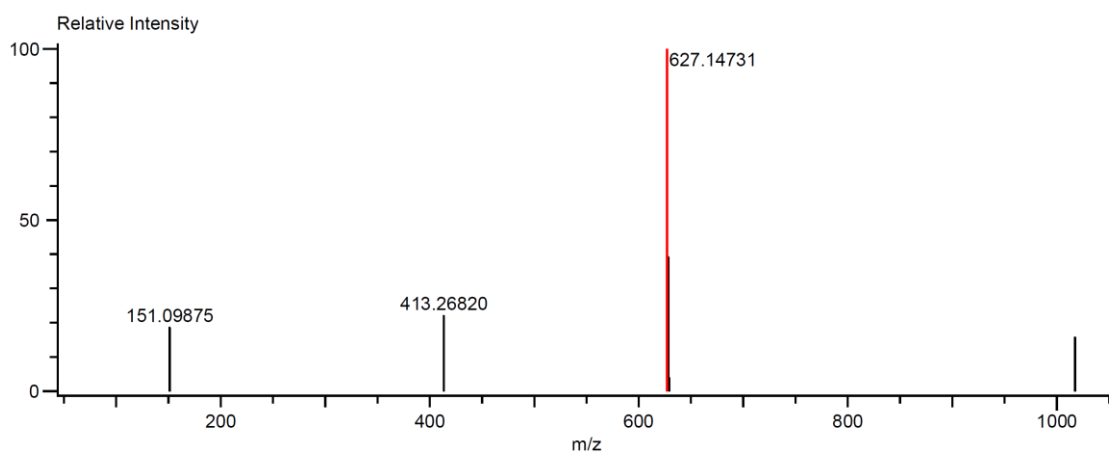

| Mass      | Intensity | Calc. Mass | Mass Difference [mDa] | Mass Difference [ppm] | Possible Formula                                                      |
|-----------|-----------|------------|-----------------------|-----------------------|-----------------------------------------------------------------------|
| 627.14731 | 4589.50   | 627.14784  | -0.54                 | -0.86                 | $^{12}\text{C}_{32}^{1}\text{H}_{28}^{23}\text{Na}^{16}\text{O}_{12}$ |

Figure S19. HRESIMS spectrum of 3.

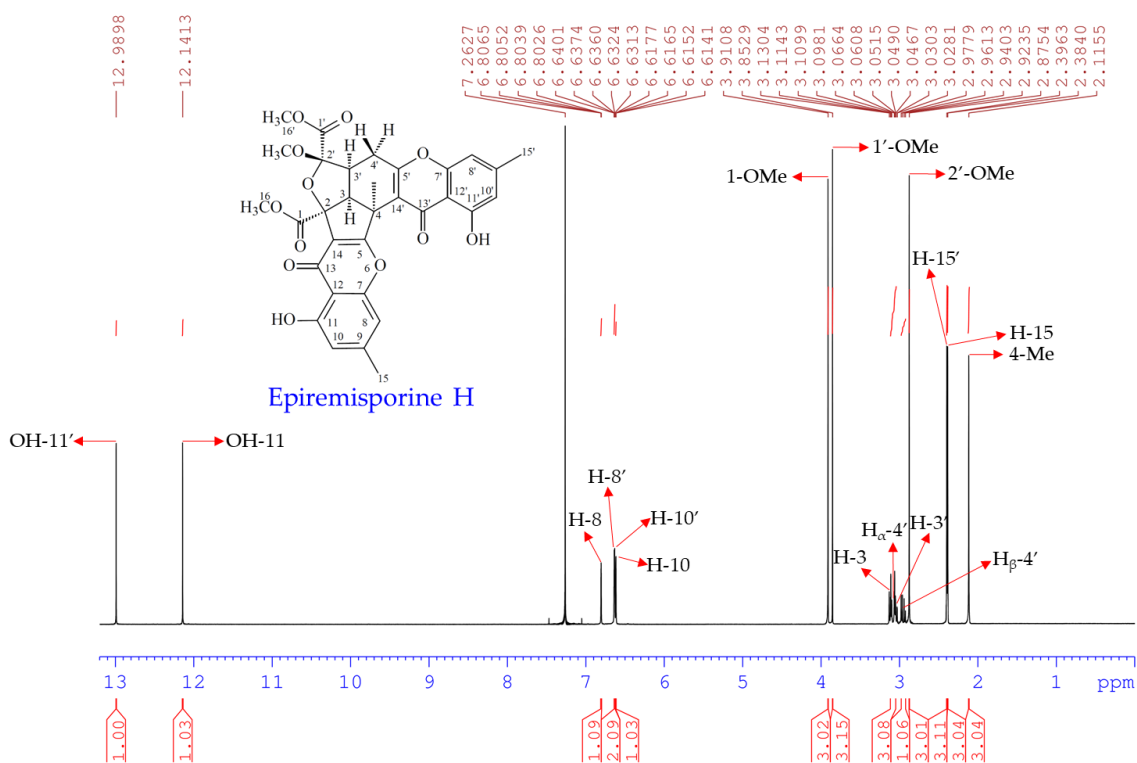

Figure S20.  $^1\text{H}$  NMR spectrum ( $\text{CDCl}_3$ , 500 MHz) of 3.

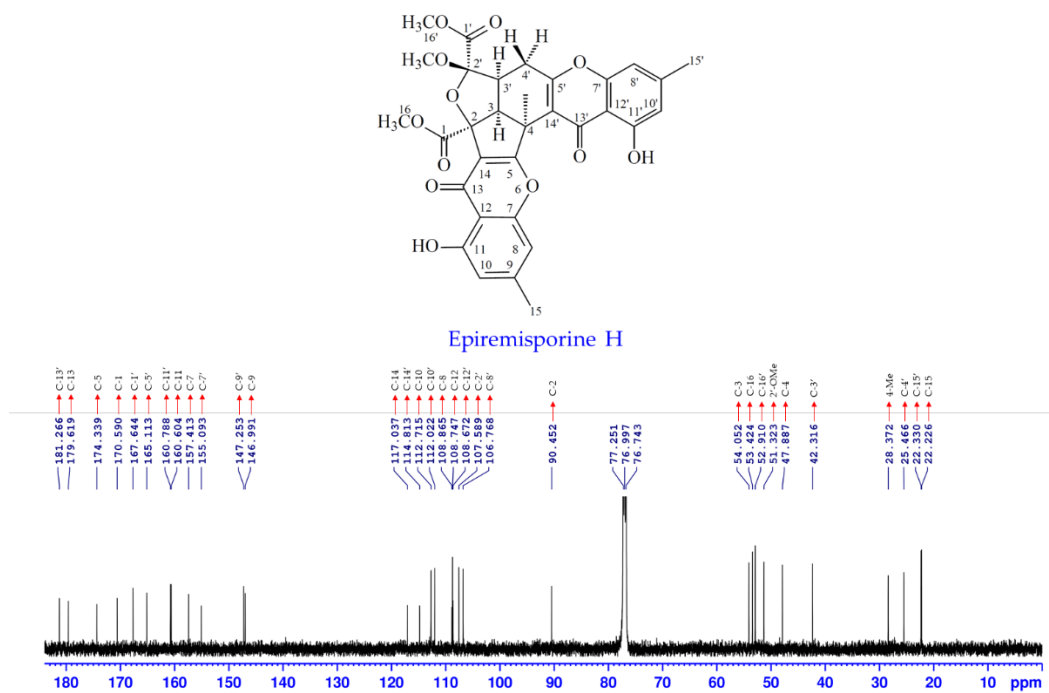

Figure S21.  $^{13}\text{C}$  NMR spectrum of 3 ( $\text{CDCl}_3$ , 125 MHz) of 3.

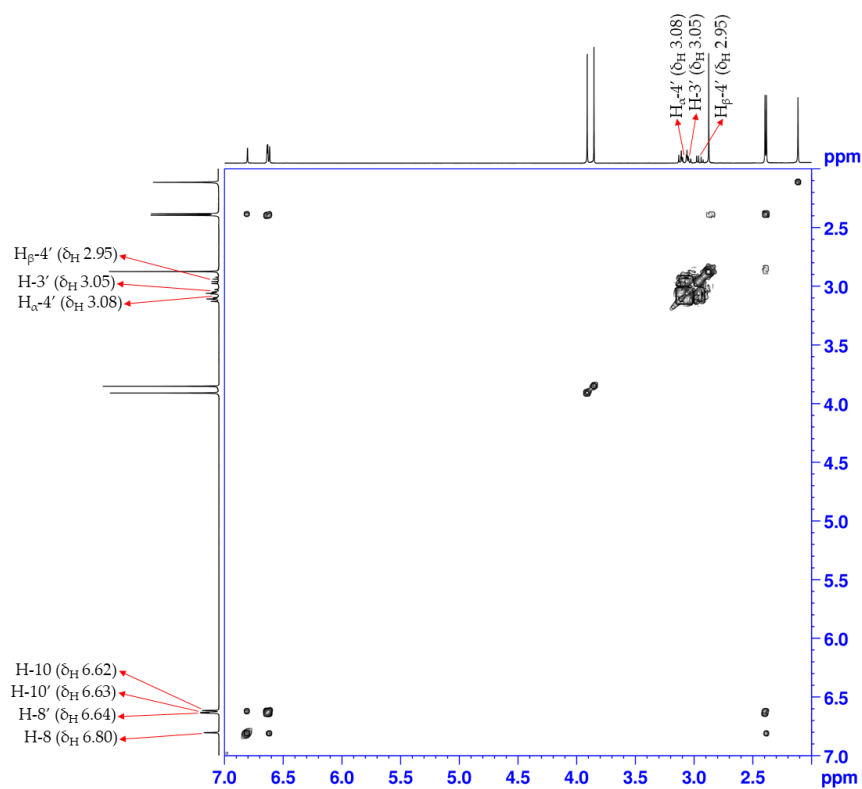

Figure S22.  $^1\text{H}$ - $^1\text{H}$  COSY spectrum of 3.

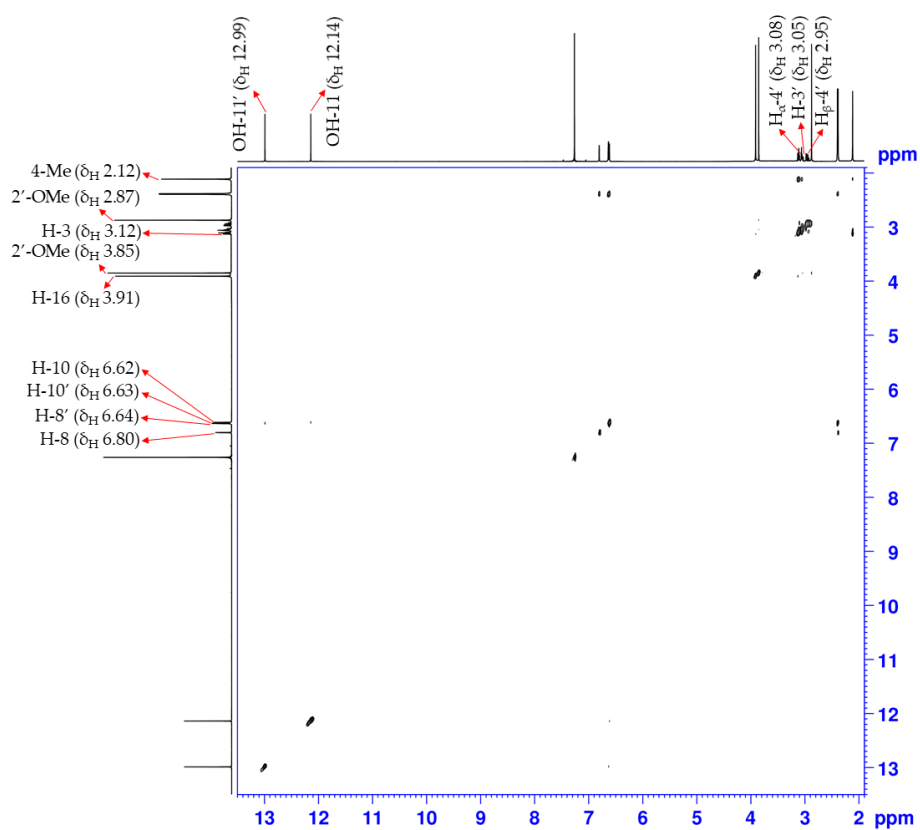

Figure S23. ROESY spectrum of 3.

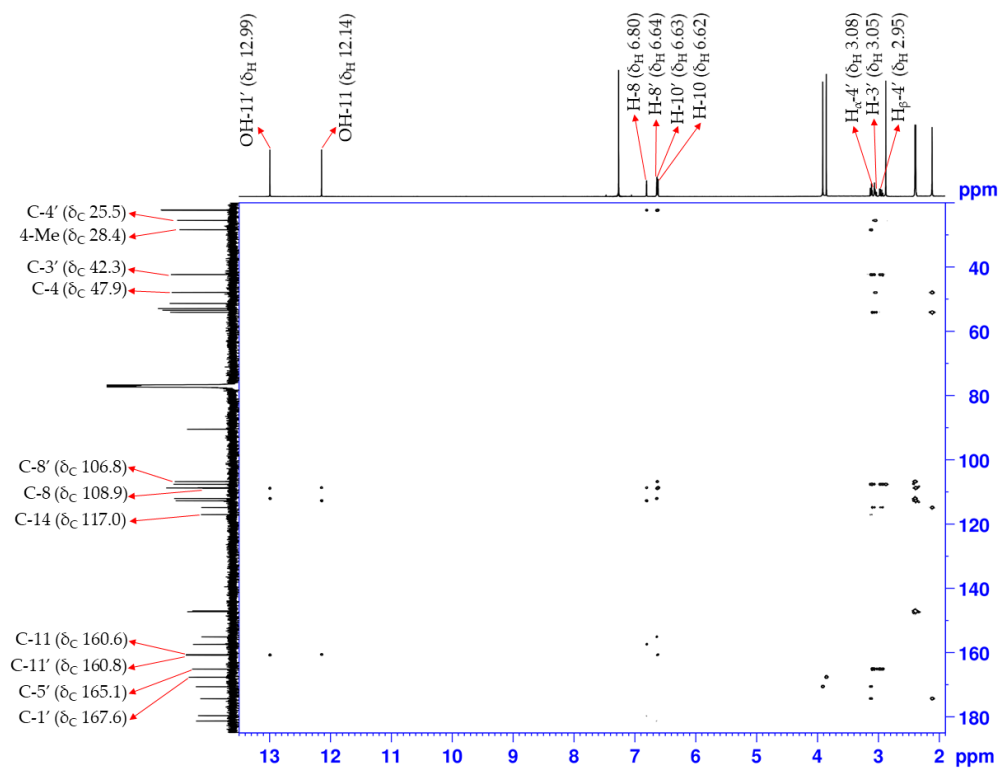

Figure S24. HMBC spectrum of 3.

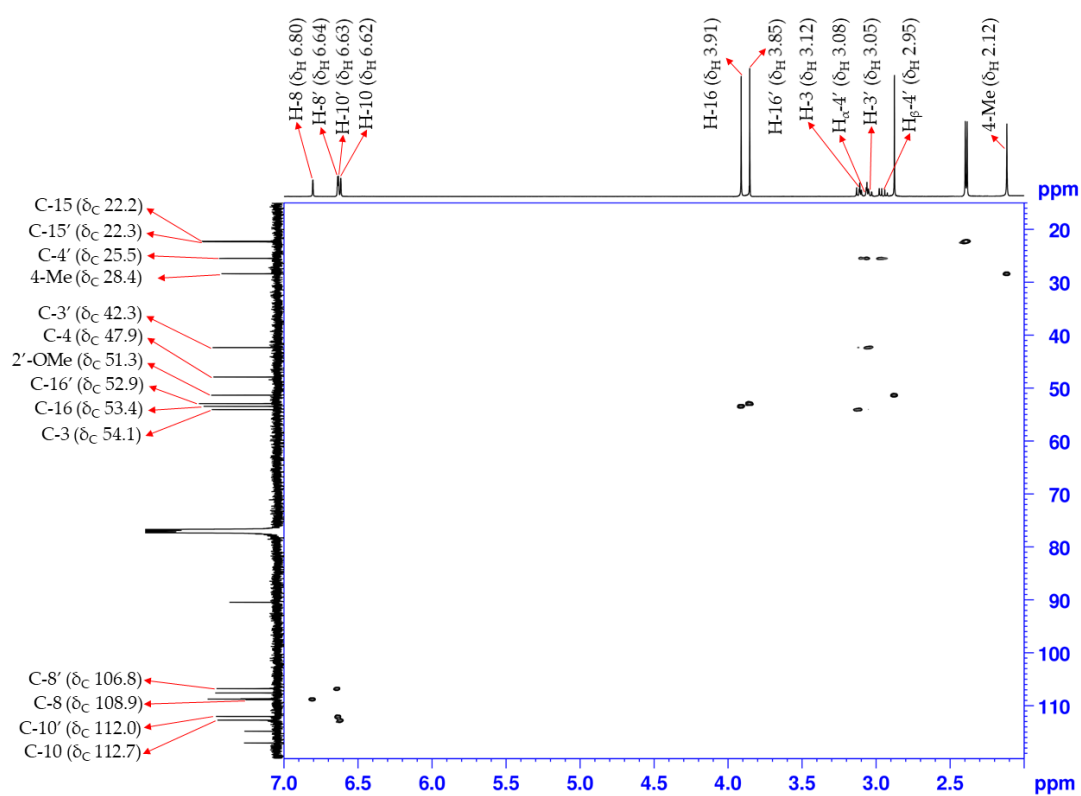

Figure S25. HSQC spectrum of 3.

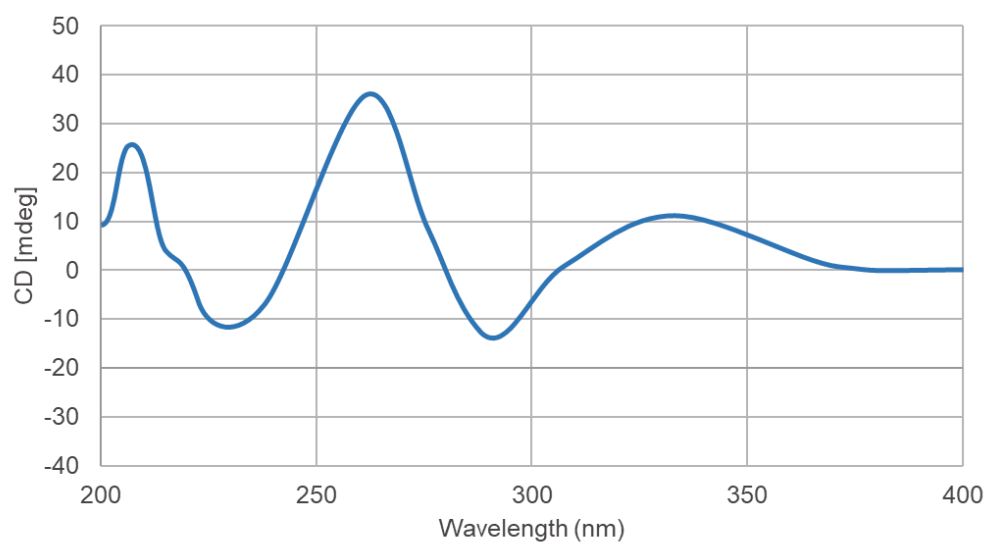

Figure S26. CD spectrum of 3.

**Table S1.** The cytotoxicity data of compounds **1–3** against HT-29 cell.

| HT-29                          | IC <sub>50</sub> (μM) |       |       |
|--------------------------------|-----------------------|-------|-------|
|                                | n=1                   | n=2   | n=3   |
| Ctrl                           | 100                   | 100   | 100   |
| Epiremisporeine F ( <b>1</b> ) | 47.78                 | 41.24 | 45.30 |
| Epiremisporeine G ( <b>2</b> ) | 30.06                 | 35.98 | 39.12 |
| Epiremisporeine H ( <b>3</b> ) | 19.97                 | 15.87 | 27.66 |
| 5-FU                           | 17.88                 | 15.32 | 19.20 |

**Table S2.** The cytotoxicity data of compounds **1–3** against A549 cell.

| A549                           | IC <sub>50</sub> (μM) |       |       |
|--------------------------------|-----------------------|-------|-------|
|                                | n=1                   | n=2   | n=3   |
| Ctrl                           | 100                   | 100   | 100   |
| Epiremisporeine F ( <b>1</b> ) | 77.44                 | 73.73 | 79.98 |
| Epiremisporeine G ( <b>2</b> ) | 56.22                 | 49.38 | 51.30 |
| Epiremisporeine H ( <b>3</b> ) | 27.62                 | 31.68 | 34.98 |
| 5-FU                           | 8.20                  | 14.91 | 9.58  |
